# Supplementary material for: Scoring sleep using respiration and movement-based features
Source: PubMed Central journal article supplement (PMC9048076; doi:10.1016/j.mex.2022.101682), 2022-03-31

# Criteria for Scoring Sleep Using Electric Field Sensors

# Contents

- This document will help you understand how to score sleep using electric field (EF) sensors.
- Sleep scoring rules are on slide 14 of this document
- Discussion topics include:
  - Sleep stages
  - What does each arousal stage look like on the EF sensors
  - Rules for scoring sleep using EF sensors
  - Pitfalls and troubleshooting

# Possible Stages:

- Wake

- Characterized by awareness and responsiveness to environment
- Includes the quiet rest time before you fall asleep

- Sleep

- Rapid Eye Movement (REM) Sleep

- Paralysis of non-respiratory muscles (except for brief twitches and eye movement)
- Enriched dream content; irregular and more shallow respiration
- Makes up ~ 5-10% of your total sleep time
- In normal sleep, occurs after Non-REM and often followed by a brief arousals

- Non-Rapid Eye Movement (Non-REM) Sleep

- Decreased responsiveness, regular respiration, some movement
- Rodents Non-REM is not further divided into the subcategories that exist in human Non-REM sleep
- Makes up the remaining 90-95% of total sleep time

# Electric Field (EF) Sensors and Sleep

- Raw Voltage Trace

- The EF sensors translate movement into a voltage trace
- The larger the movement, the bigger the voltage signal. Different animal movements will show up as unique voltage patterns (on next slide)
- When the animal is sleeping, it is still moving (breathing, twitches during REM)

- Spectrogram

- The different patterns in the voltage trace are easier to see when you convert them into a spectrogram
- A spectrogram visualizes the frequencies and relative representation (power) of each frequency in a voltage trace

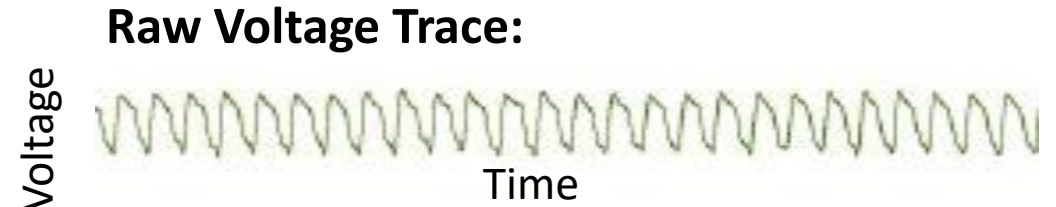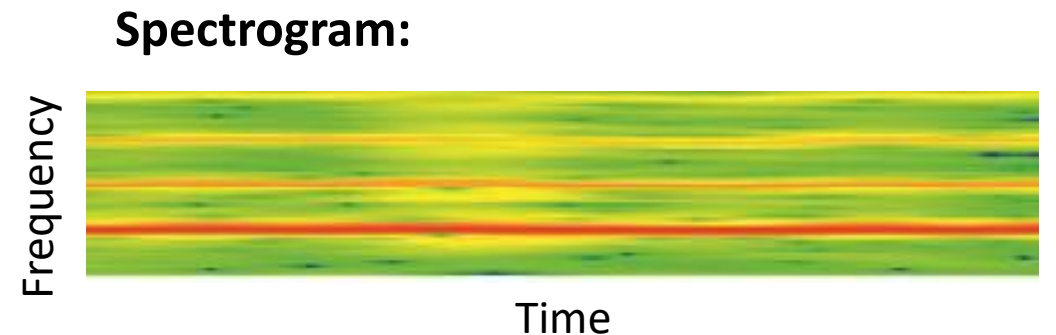

Color denotes the relative strength (power) of the frequency. Red means high power (i.e. that frequency is strongly present), green/blue means low power (i.e. that frequency has weak or no presence)

# What does WAKE look like on the EF sensors?

Exploration **Raw Voltage Trace:**

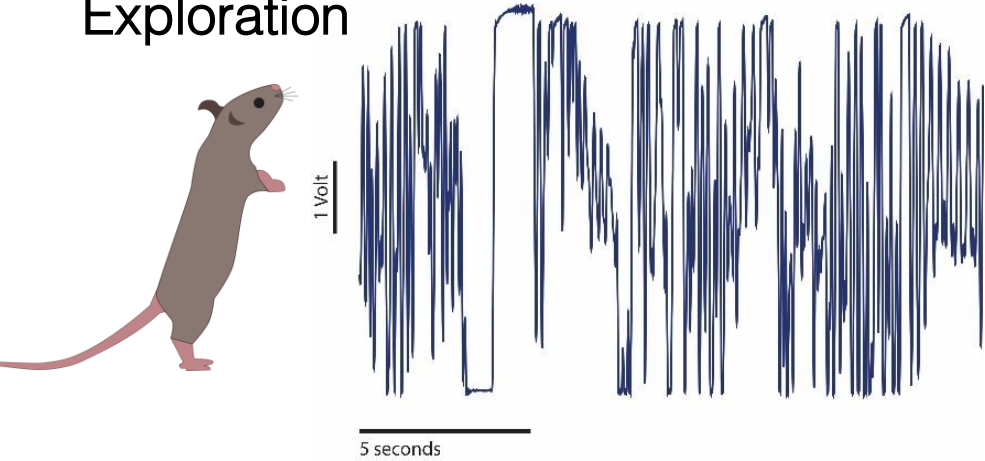

Grooming

**Raw Voltage Trace:**

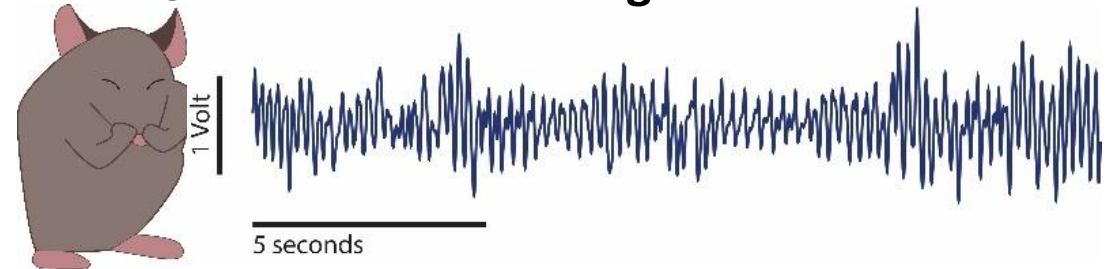

Eating

**Raw Voltage Trace:**

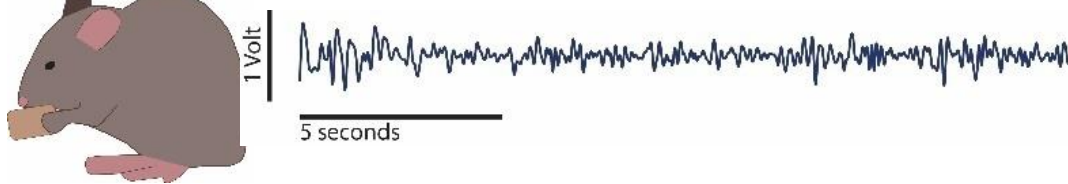

Drinking

**Raw Voltage Trace:**

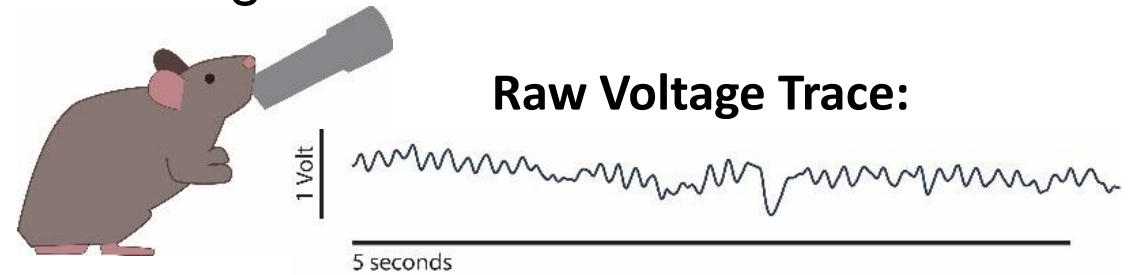

- EF sensors record Wake as many different voltage patterns

# More WAKE Examples with Spectrograms

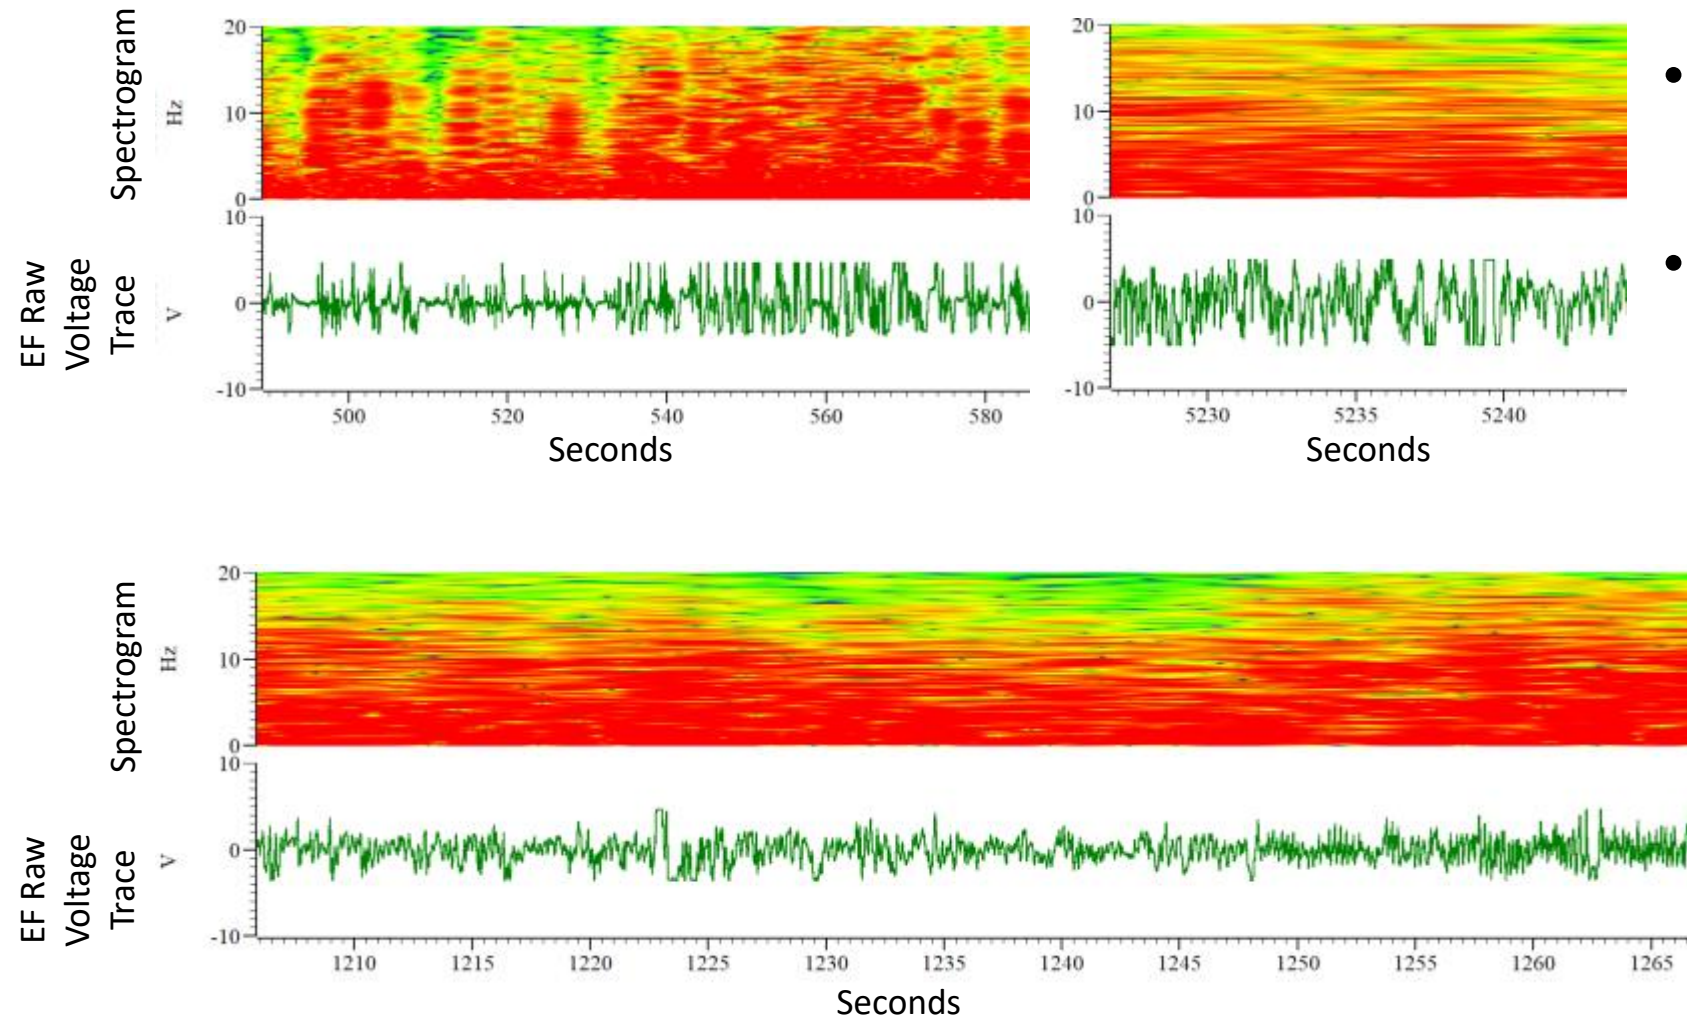

- The animal is typically moving or sniffing while awake.
- Definition of WAKE:
  - Raw Voltage Trace
    - **Large** amplitude (relative)
    - **Erratic** shape with **high variability** of amplitude and width
  - Spectrogram
    - Powerful (i.e. more red) signal
    - Solidly covers frequencies  $\sim 0$  to 15-20 Hz (there is a caveat to this because grooming, eating, and drinking sometimes show up with a slightly stronger wide and messy band between 5-10 Hz)

# What is Non-REM Sleep for the EF Sensors?

## Examples of Voltage Trace Patterns of Respiration During NREM Sleep

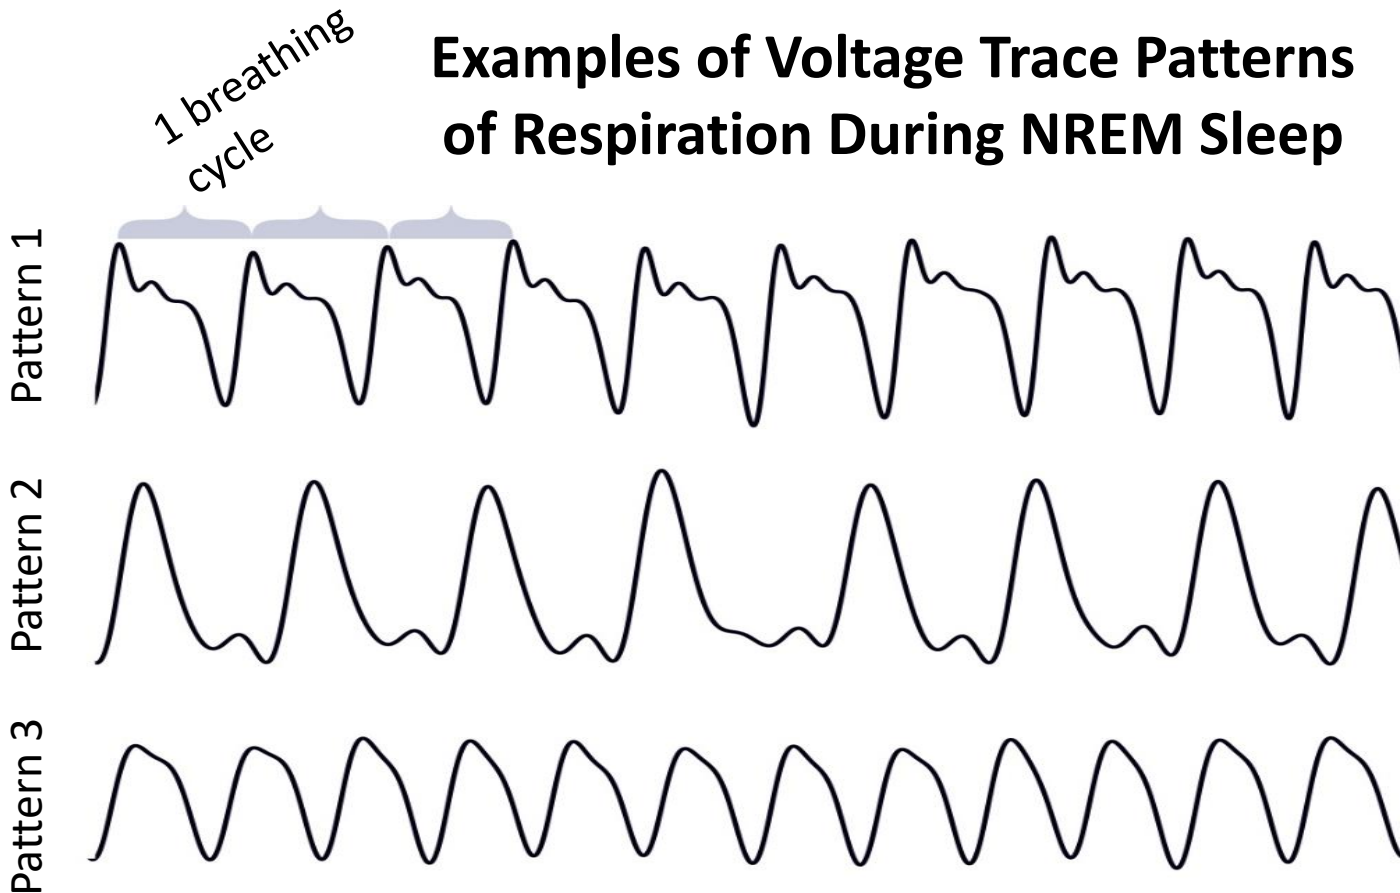

- During Non-REM sleep, the animal is still moving because breathing expands and contracts the chest wall (this shows up as a consistent cyclic pattern on the EF sensors).
- The cyclic pattern will change based on the animal's orientation to the sensors (see left), but the shapes will remain consistent during a Non-REM event.

# Non-REM Sleep Examples

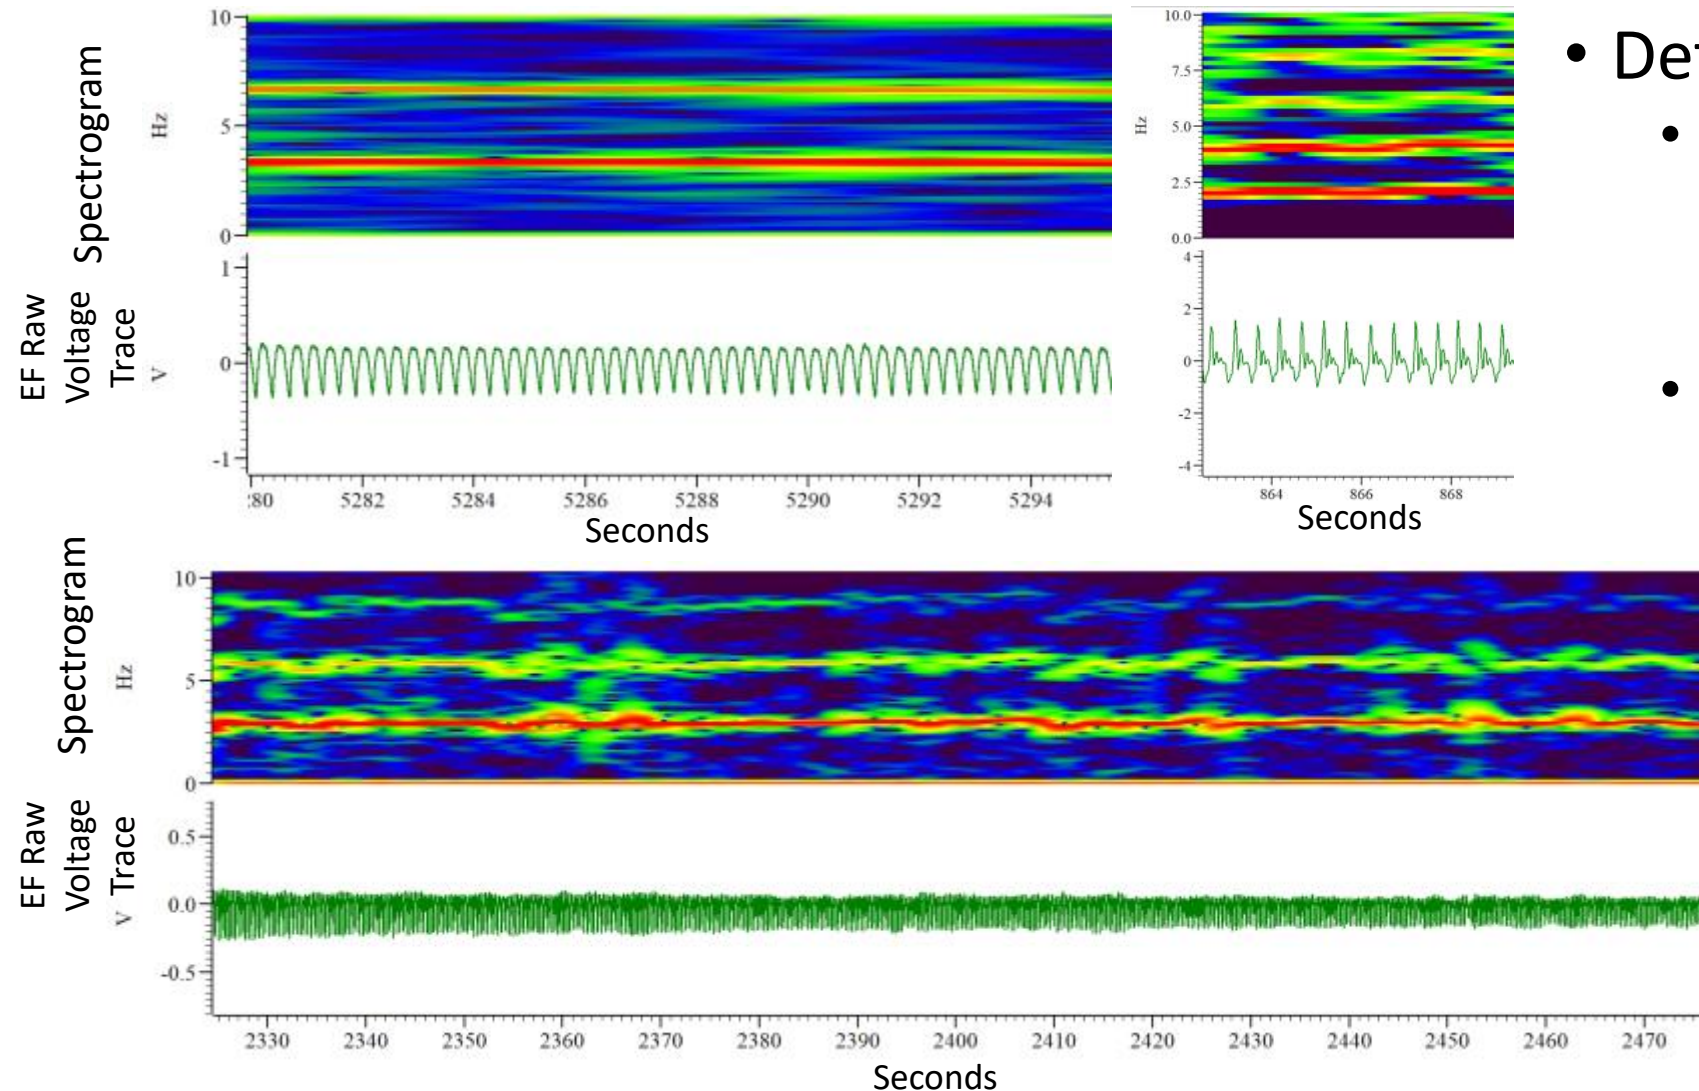

- The animal typically stays in one place during Non-REM sleep.
- Definition of NREM Sleep:
  - Raw Voltage Trace
    - **Low** amplitude (relative)
    - **Consistent** shape with **consistent** amplitude and width
  - Spectrogram
    - Powerful (i.e. more red) single band between 2-4 Hz against a relatively less powerful (i.e. more blue and green) field.
    - Very little to no other frequencies present
    - May have less powerful harmonic lines at frequency multiples of band (this is because the waveform is not a perfect sine wave).



# What is REM Sleep to the EF Sensors?

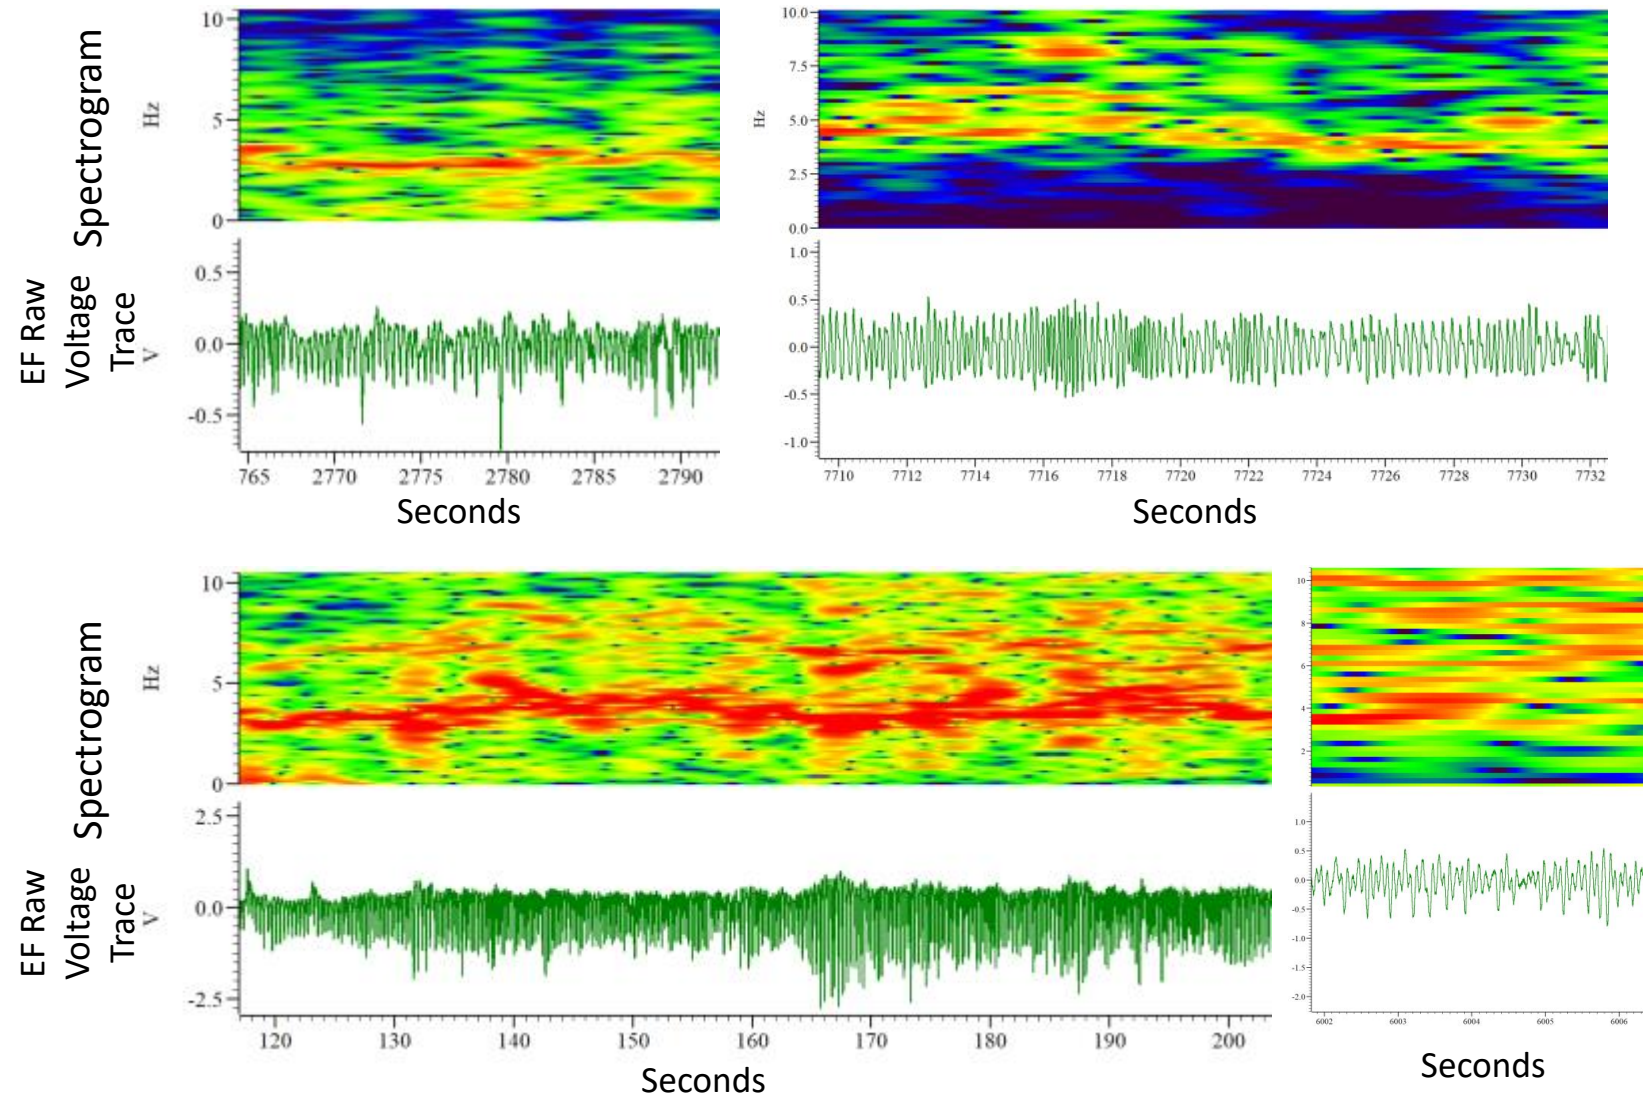

- During REM sleep, there are small twitches of fingers, ears, eyes, and toes, but breathing is still the dominant motion.
- These twitches show up on the voltage trace and “muddy” the cyclic breathing pattern.

# REM Examples

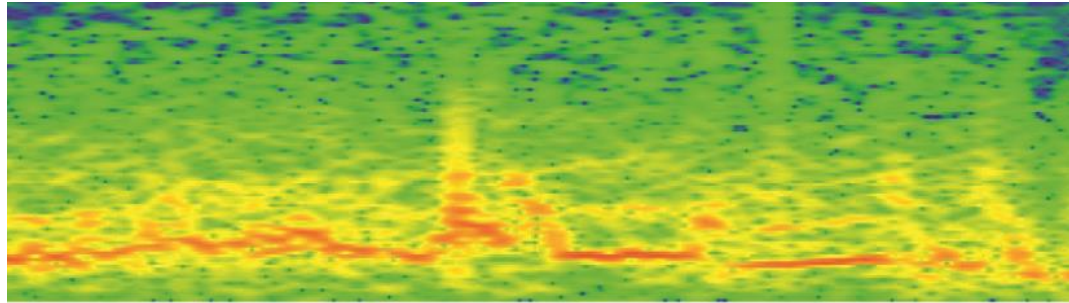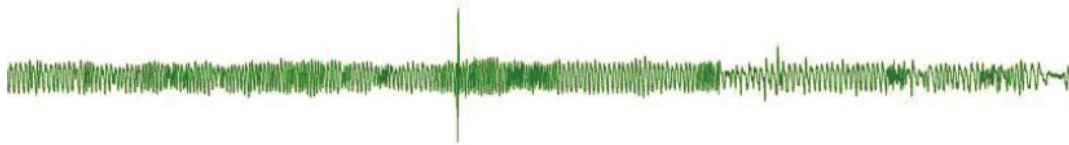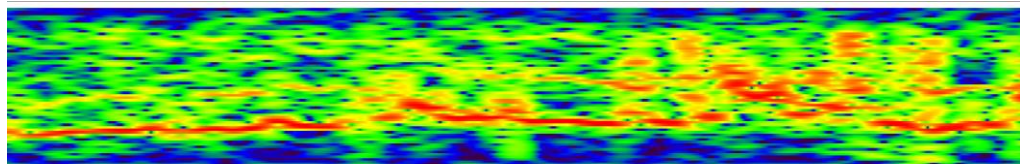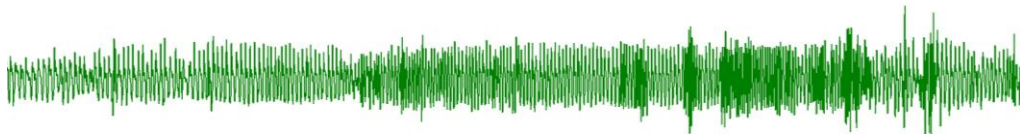

This example is entirely REM, but there are two distinct patterns – that's ok!

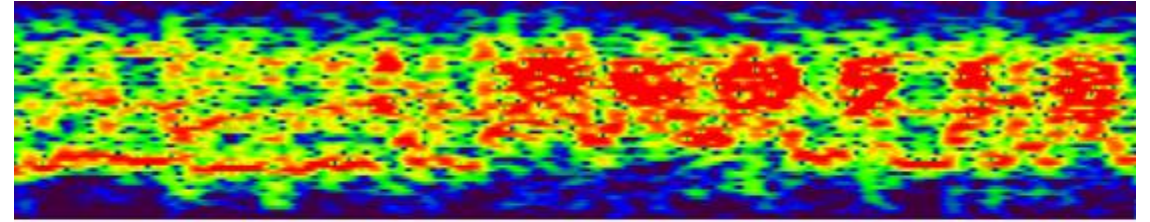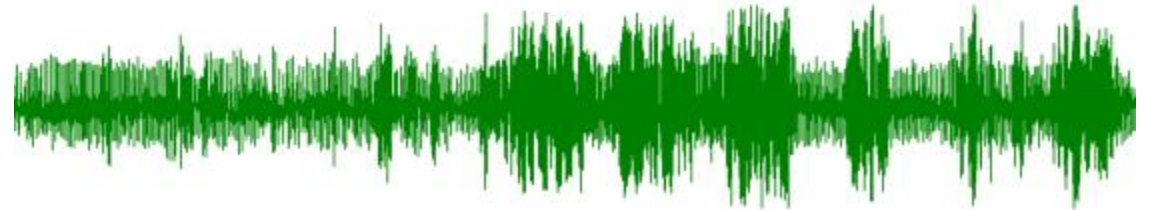

- The animal is mostly still during REM sleep.
- Definition of REM Sleep:
  - Raw Voltage Trace
    - **Similar** amplitude to preceding Non-REM signal
    - **Somewhat Erratic** shape (relative to Non-REM signal) with **Erratic** sinusoidal amplitude and width (but not so much as WAKE)
  - Spectrogram
    - Fragmented, spotty red pattern between 1-10 Hz (there should be NO meaningful signal <1 Hz, otherwise it might be WAKE).

# Putting All the Stages Together – getting a sense of transitions

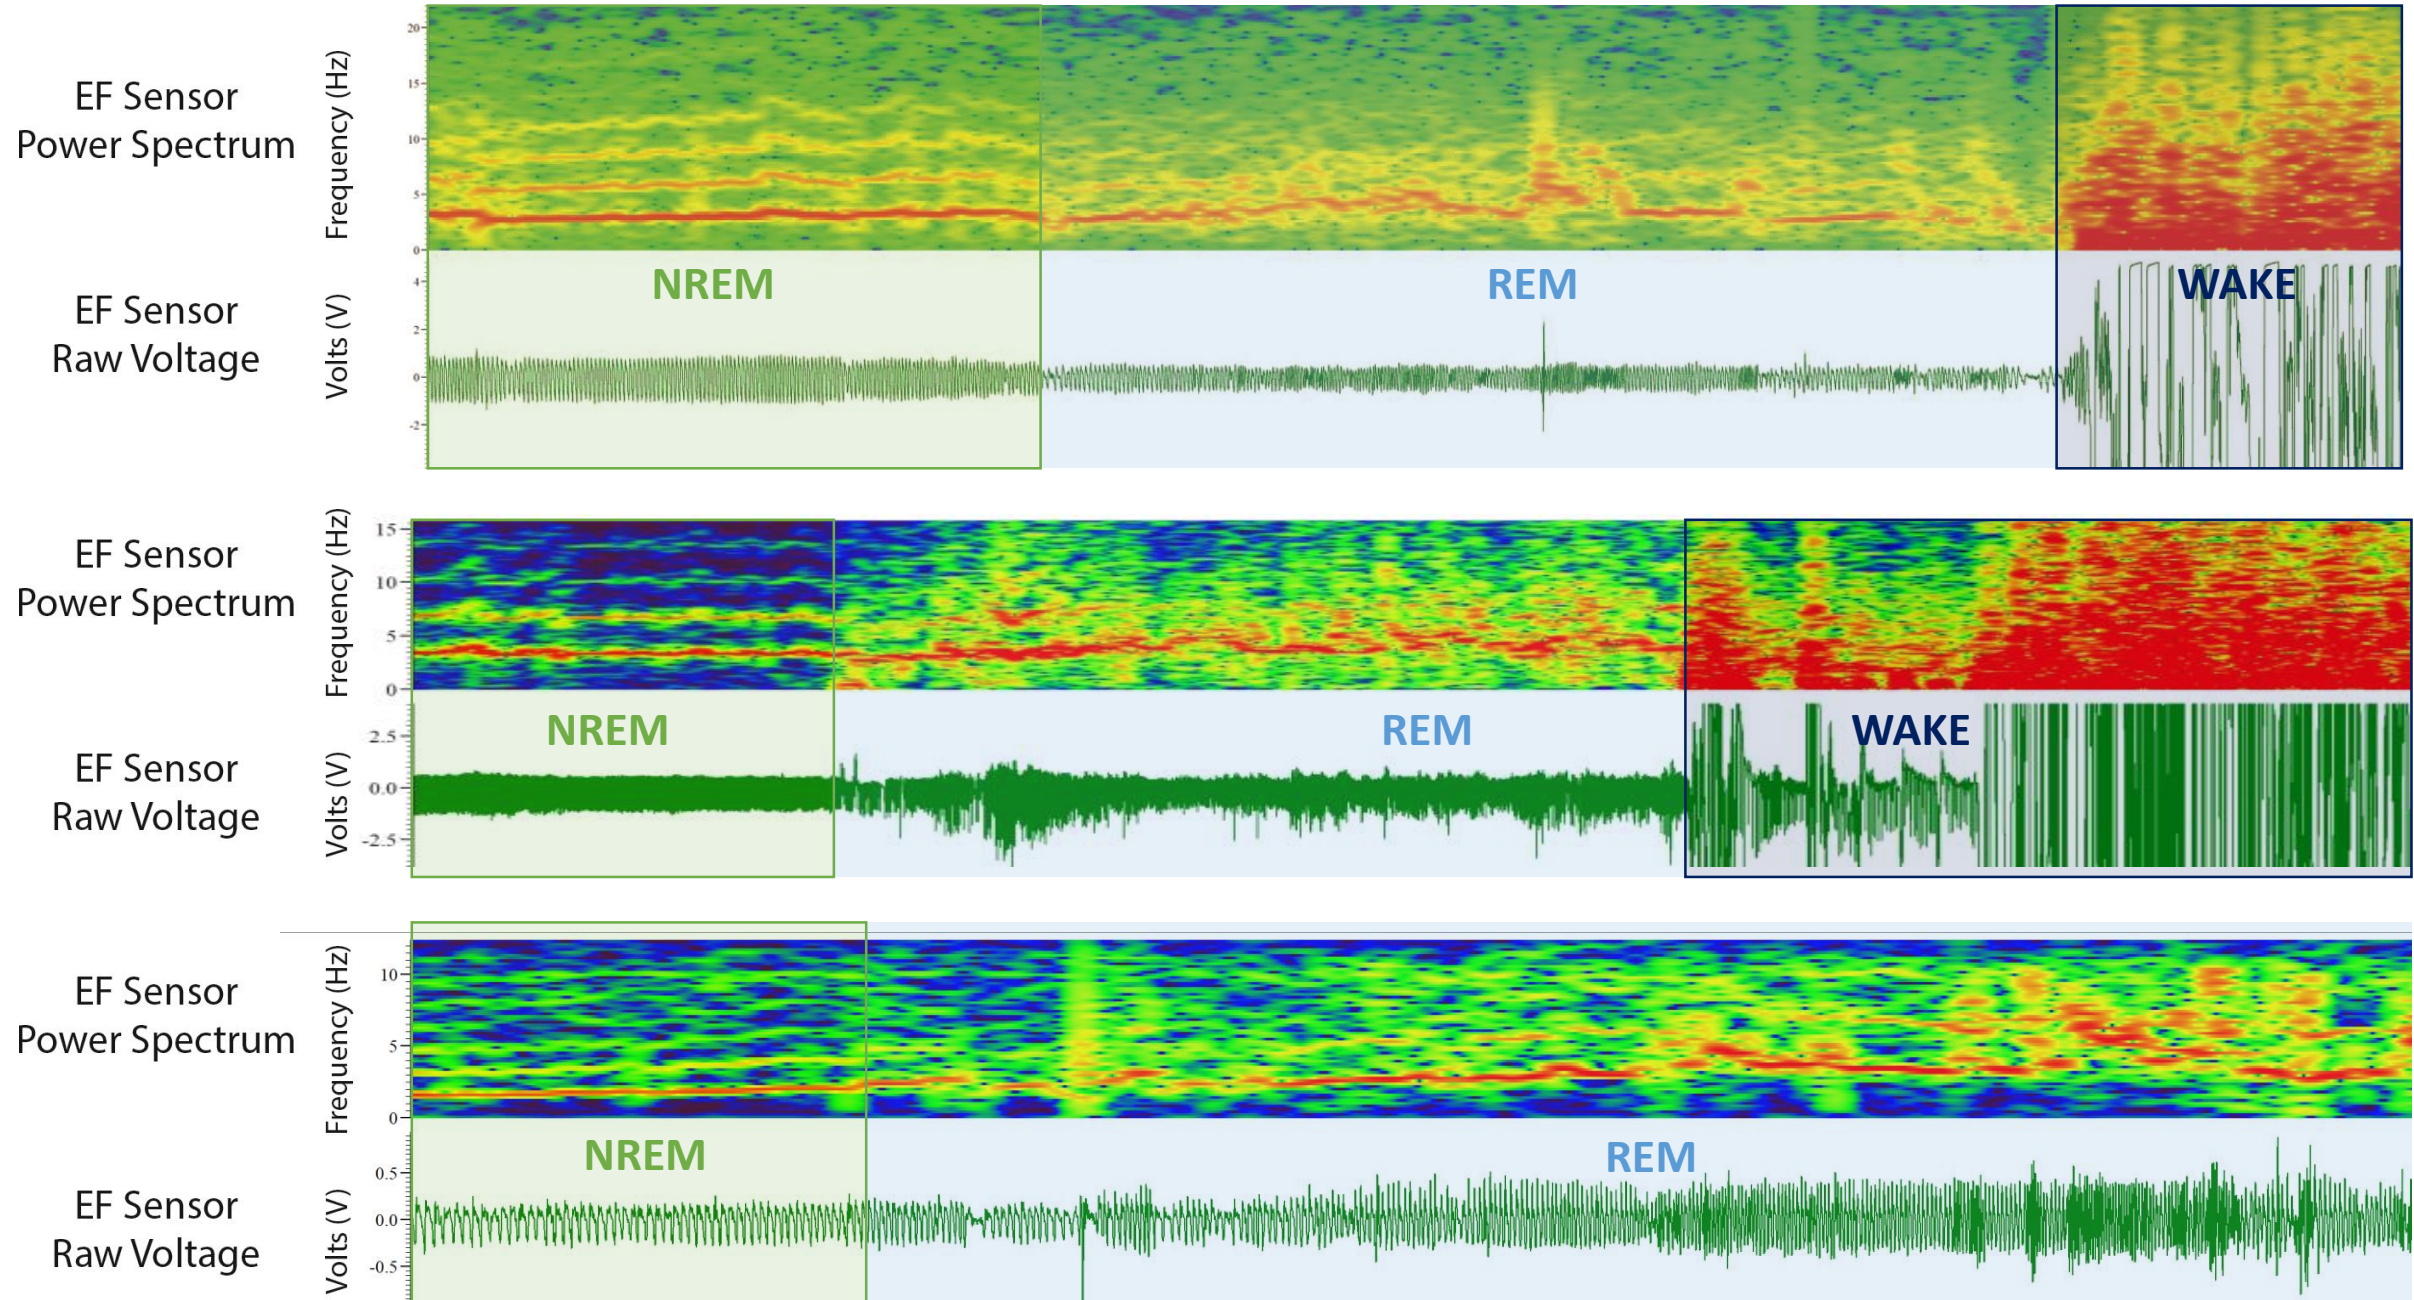

# More Examples...

This portion is not long enough to count as an arousal (WAKE) – we'll talk about how to label this later

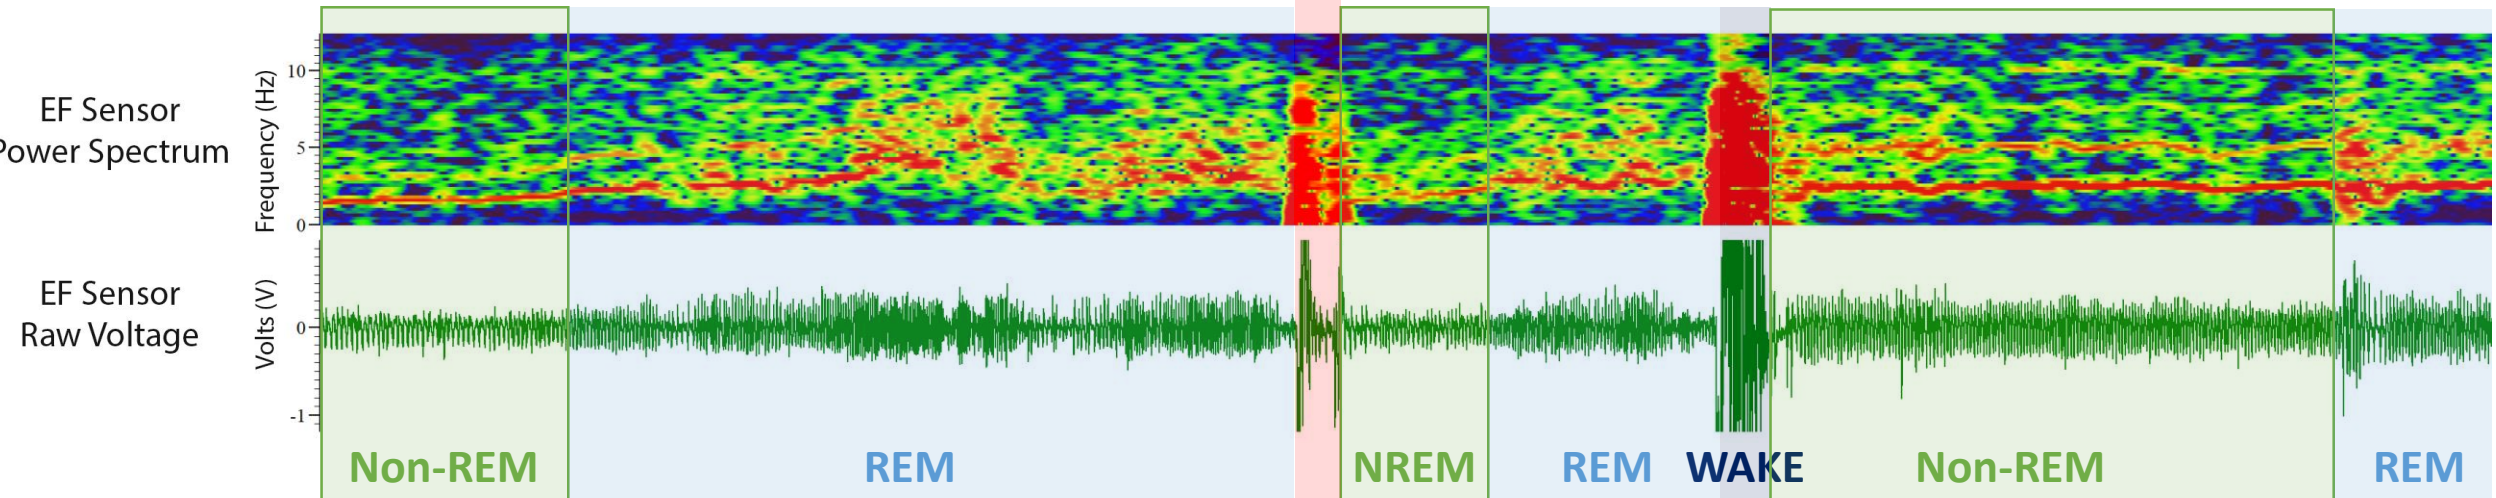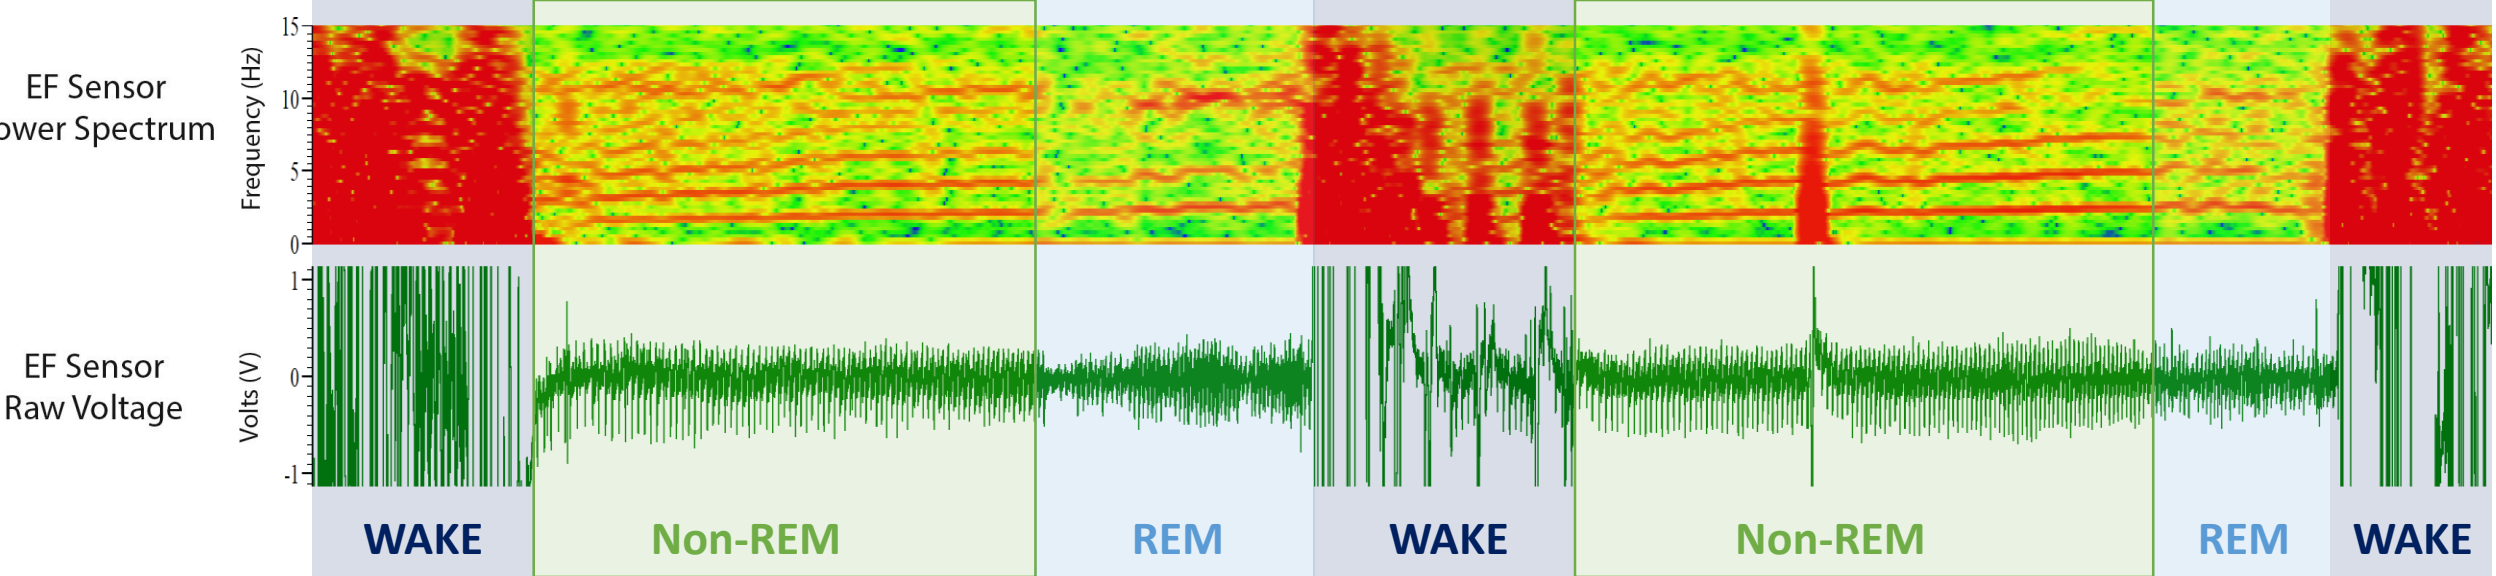

These REM portions are subtle with strong respiration signal still – you have to look at the raw voltage trace and the >5Hz frequency area

# How is Sleep Scored

- Sleep is scored by dividing your data into individual chunks (called epochs) of a few seconds and assigning a state (**WAKE: W**, **Non-REM: N**, or **REM: R**) to each epoch:

Epochs are assigned a single state, even if two states exist within it

Grooming

10-second epochs

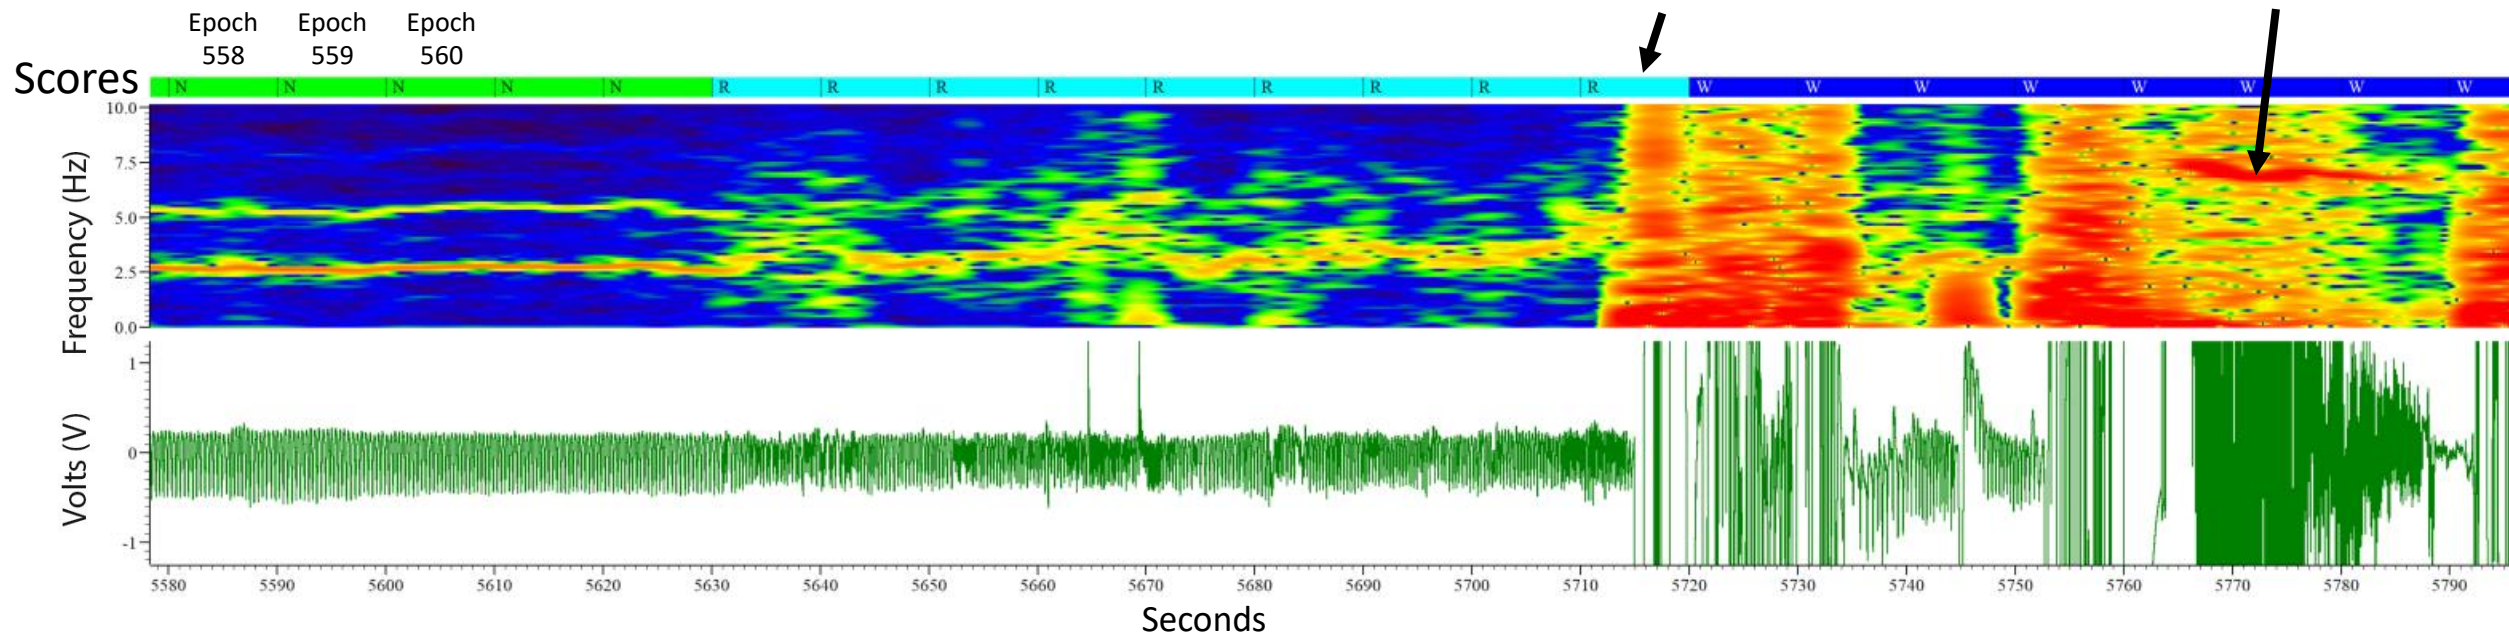

# Rules for Scoring Sleep in Mice Using EF

- Each epoch is scored based on the majority of the signal present in that epoch
  - i.e. if a 10-second epoch has 7 seconds of **WAKE** and 3 seconds of **Non-REM**, it will be scored as **WAKE**
  - If an epoch is evenly divided b/t two states, score it as the immediately previous state
- **REM CANNOT** transition directly from **WAKE** without **Non-REM** between
- **Non-REM CANNOT** exist as a single epoch
  - You must have two+ consecutive epochs of **Non-REM** to change the state to **Non-REM**
  - You **CAN** have a single epoch of **WAKE**, but only if it is 10+ seconds long **AND** follows the majority rule above

# Troubleshooting and More Examples

- More information about handling brief arousals
- More examples of scoring transitions

# When you have a single **WAKE** epoch in a sea of **Non-REM**

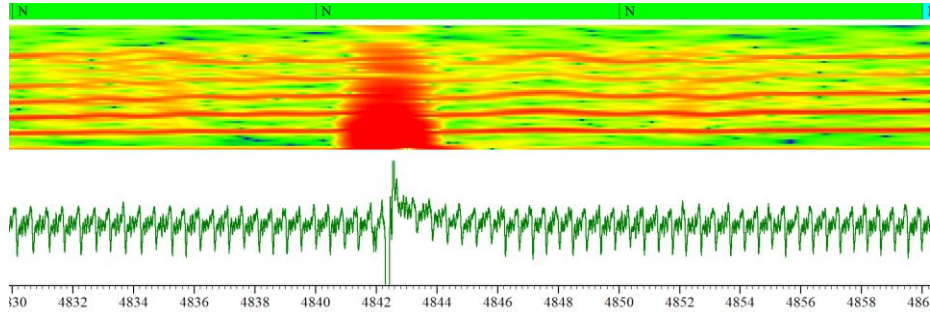

- This is a twitch, the actual movement on the voltage trace only lasts ~3 seconds, so there is no scored **WAKE** state change

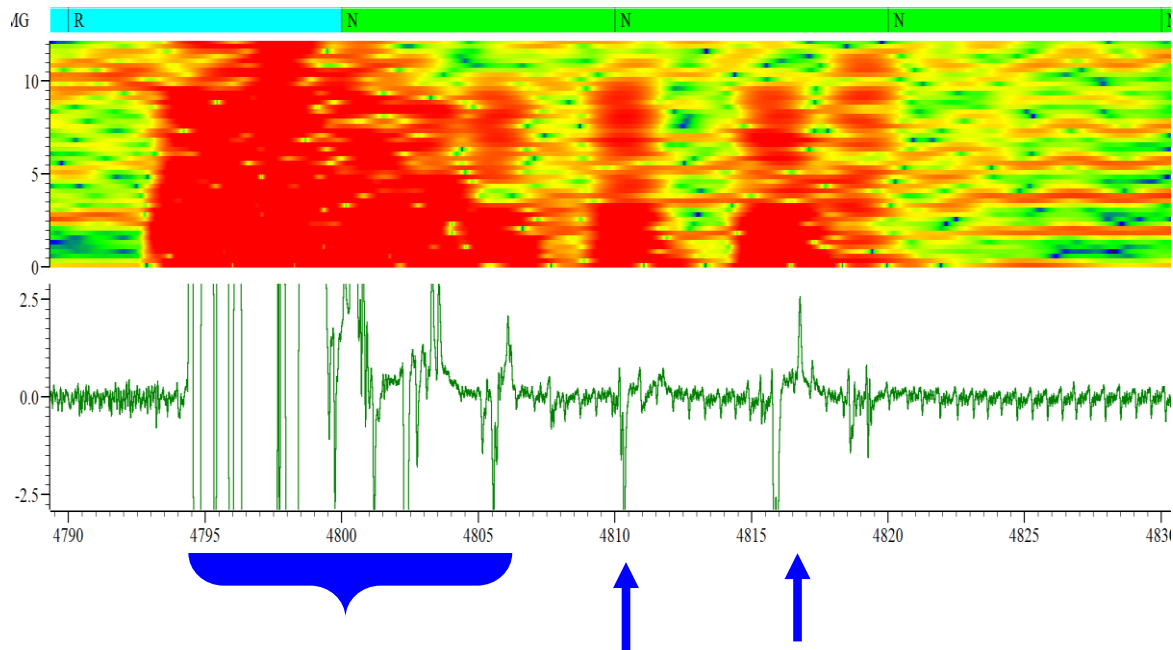

- The **WAKE** behavior (bracketed left) signal meets the 10+ second criteria, but not the majority rule b/c it straddles two epochs without taking a clear majority for either
- The blue arrows are independent twitches that are not part of the previous 10-sec movement. This is because you can see distinct and even respiration cycles between the twitches



# More Examples

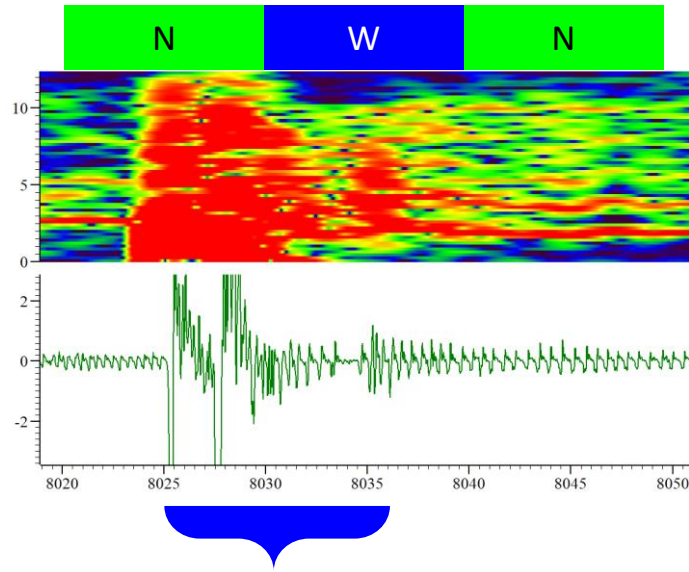

- This event meets the 10+sec and majority rules (though it BARELY meets the majority rule)
- The first epoch is still scored as **Non-REM** b/c **WAKE** does not occupy a majority of the epoch so it is scored as the previous state.

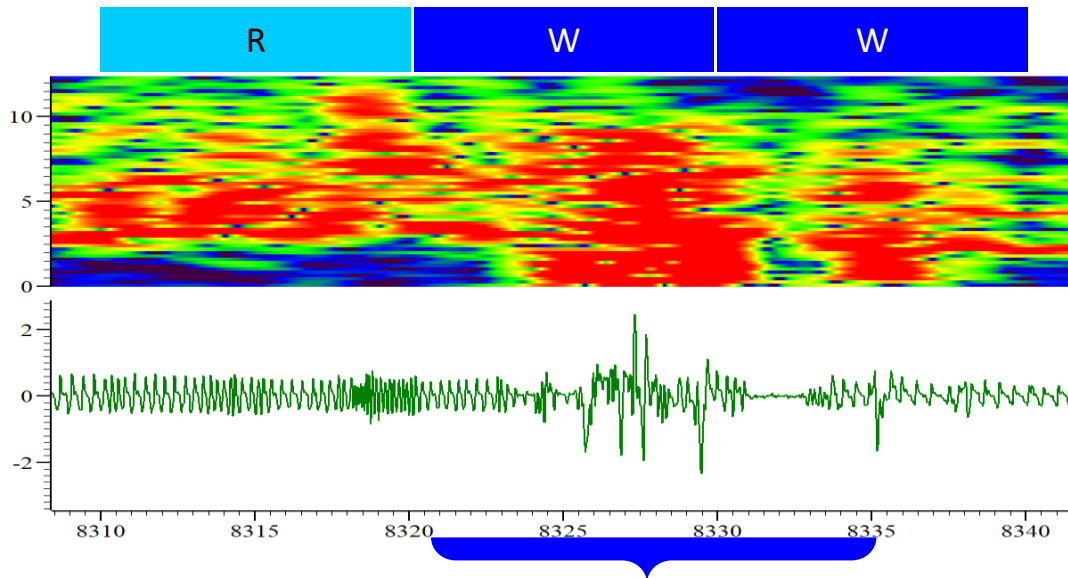

- This event meets the 10+sec and majority rules
- The middle epoch is scored as **WAKE** b/c **REM** does not occupy a majority of the epoch.

# Remember this?

This portion is not long enough to count as an arousal (WAKE) – we'll talk about this now 😊

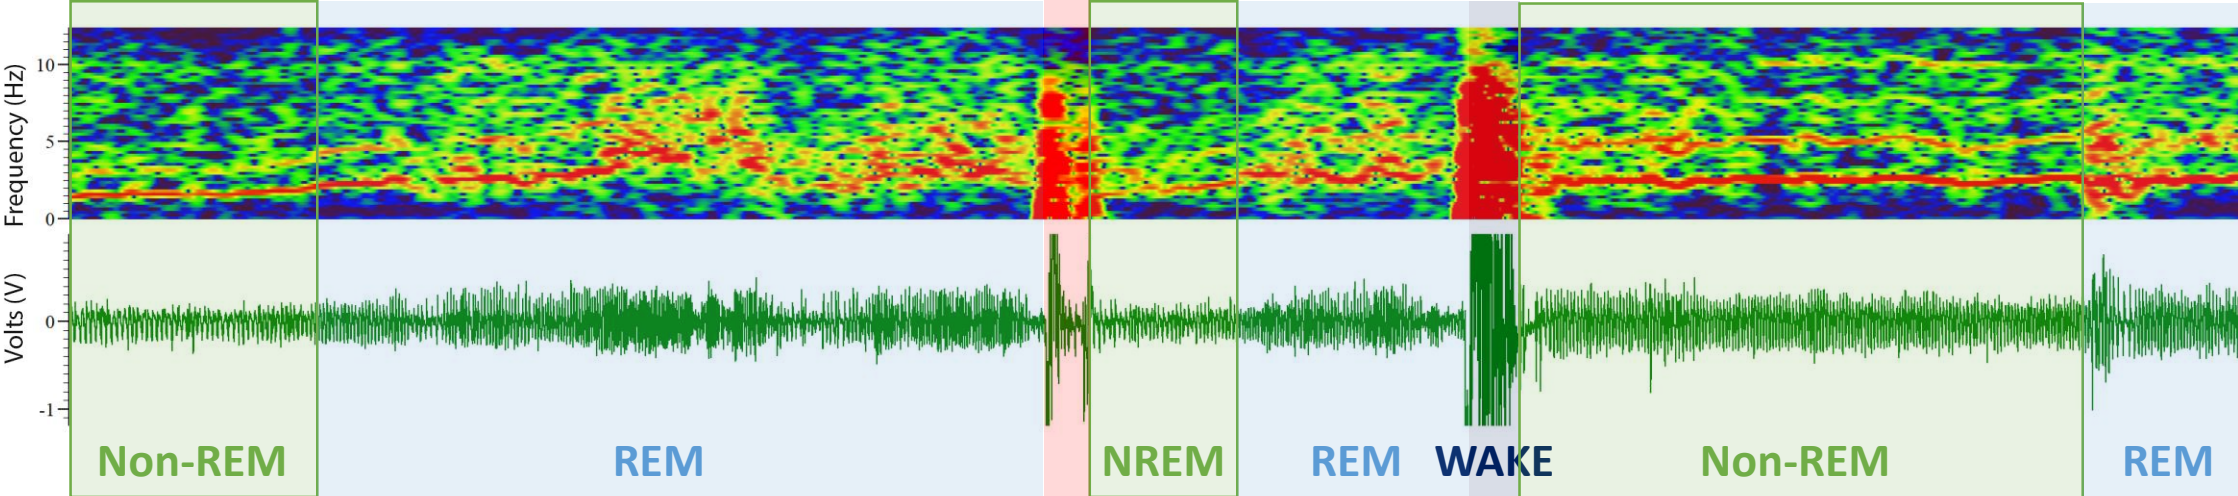

This portion gets scored as Non-REM b/c the arousal does not meet the 10+ sec or majority criteria. This does not get scored as more REM b/c REM ends with the arousal movement

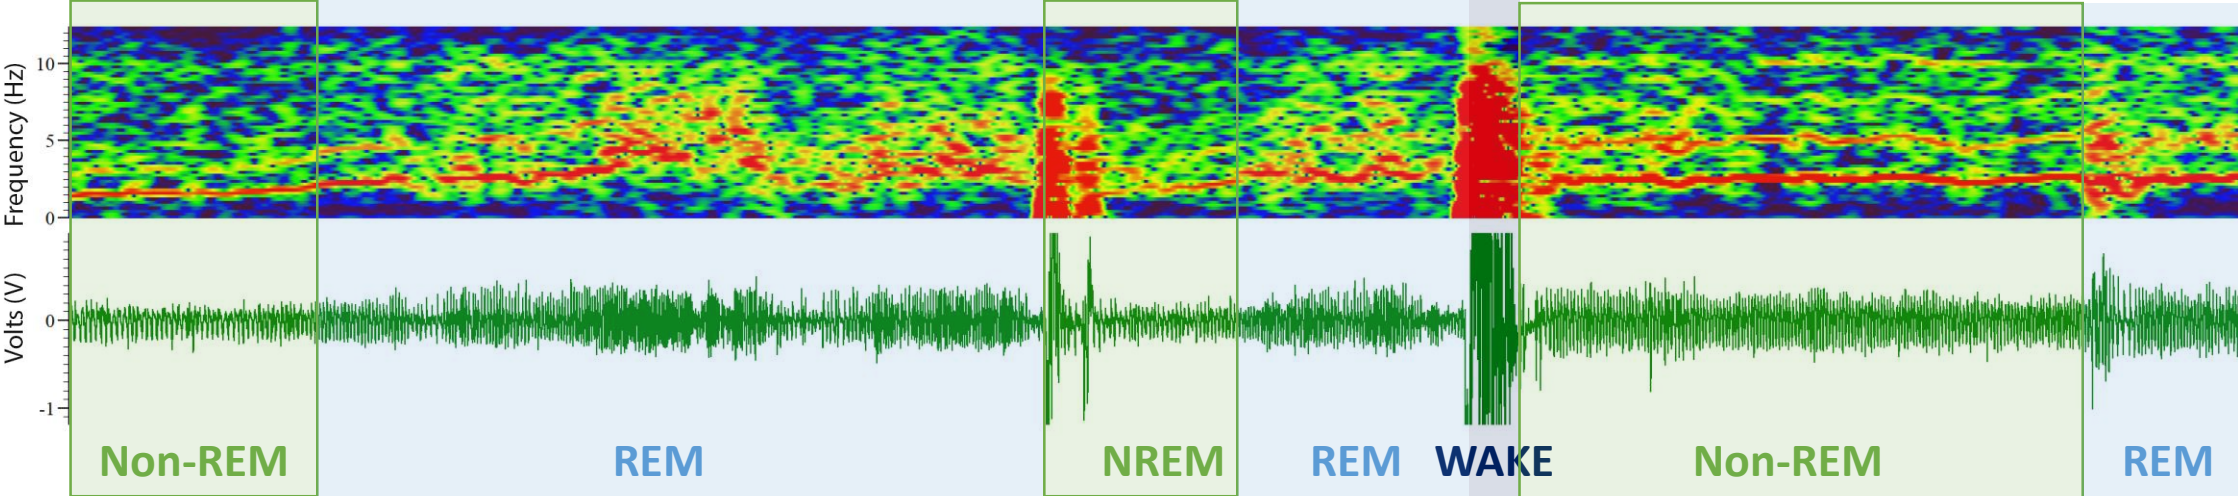

Supplement: mmc1.pdf [file mmc1.pdf]
